# Supplementary material for: First insights into deep convection by the Doppler velocity measurements of the EarthCARE's Cloud Profiling Radar
Source: Copernicus journal article supplement (doi:10.5194/egusphere-2025-1914), 2025-05-15
Supplement: Supplementary file [file egusphere-2025-1914-AC3-supplement.pdf]

## **ANSWER TO REVIEWER**

### **Manuscript egusphere-2025-1914 "First insights into deep convection by the Doppler velocity measurements of the Earth- CARE's Cloud Profiling Radar"**

Dear Authors,

I have taken note of your initial reaction to my review (i.e. suggestions you agree with and those you disagree with). However, I would like to invite you to please consider

1) points that are also made by the second reviewer (e.g. regarding the convention for the sign of velocities, which is an easy fix);

And

2) more importantly, the PDF I attached which details the corrections and edits that I invite you to apply (I only see your reaction to the paragraph posted online, which is only one of many suggested corrections from your title to your references).

Respectfully,

Dear Reviewer,

Thank you very much for your thoughtful feedback, and for the considerable effort you have invested in providing such detailed comments and suggestions.

We truly appreciate the time you took to not only review the manuscript but also to prepare the comprehensive PDF with corrections and edits across the entire document. We acknowledge the importance of the additional points raised—such as the convention for the sign of velocities—and we are currently working on a revised version of the manuscript that carefully implements all the suggested changes, from the title through to the references.

We are committed to addressing your comments in full and will ensure that our revision reflects this.

Sincerely,

Aida Galfione, on behalf of all Authors
